# Supplementary material for: Non-edible plant seeds of Acacia farnesiana as a new and effective source for biofuel production
Source: PubMed Central journal article supplement — RSC Adv. 2022 Aug 2;12(33):21223–34. doi: 10.1039/d2ra03406a (PMC9345019; doi:10.1039/d2ra03406a), 2022-08-02
Supplement: RA-012-D2RA03406A-s001.pdf [file RA-012-D2RA03406A-s001.pdf]

1 **Non-edible plant seeds of *Acacia farnesiana* as a new and effective source for biofuel**  
2 **production**

3 Inam Ullah Khan<sup>1\*</sup>, Abdul Haleem<sup>1,2\*</sup> Assad Ullah Khan<sup>3</sup>

4 <sup>1</sup>*Department of Chemistry, Quaid-i-Azam University, Islamabad 45320, Pakistan*

5 <sup>2</sup>*Department of Chemistry, Faculty of Natural Science, The University of Haripur, Haripur,*  
6 *KPK 22620, Pakistan*

7 <sup>3</sup>*Department of Economics, University of Science and Technology Bannu, Bannu, KPK 28100,*  
8 *Pakistan*

9

10 \*Corresponding authors: Inam Ullah Khan & Abdul Haleem

11 E-mail: [khanqau123@yahoo.com](mailto:khanqau123@yahoo.com) and [haleem0300@gmail.com](mailto:haleem0300@gmail.com)

12

## Supporting Materials

13

### 14 S1. Plant description

15 In this study, *Acacia farnesiana* (AF) is chosen as the inedible raw material to produce  
16 biodiesel. Its scientific name is *Acacia farnesiana*, Family *Leguminosae (Mimosoideae)*,  
17 native to North America. This tall semi-evergreen native shrub or small tree is commonly  
18 referred to as sweet acacia, Huisache, etc., with soft, medium-green feather-like, finely  
19 divided small leaves. The slightly thick stem is rich in chocolate brown or grey, with long and  
20 pointed needles. The small, puff-like yellow flowers are very fragrant, appear in clusters in  
21 late winter, and then occasionally spread out after each new flush, providing nearly four  
22 seasons of flowering. An area of about one hectare wills 91,500 kg of seeds yield, and the  
23 efficiency of oil per hectare is approximately 21,250 kg. The fruit is an elongated pod, 3 to 6  
24 inches long, dry, and covered with hard skin, brown. Green colour attracts birds; squirrels and  
25 other mammals have no obvious littering problems and stick to the trees, which is very  
26 beautiful. The long-lasting fruit has a smooth appearance and contains seeds cherished by  
27 birds and other wildlife.

### 28 S2. Mechanical extraction of *Acacia farnesiana* seed

29 The mechanical extraction of AF seeds was done by two different electric oil expeller  
30 machines, FANGTAI SHIBAYOUFANG FL-S2017 China (less power extractor) and  
31 FANGTAI SHIBAYOUFANG J508, China (high power extractor). Pre-treatment of seed is  
32 essential for mechanical extraction, which can increase the amount of oil recovery. After 2-3  
33 revolutions, a large yield of crude AFSO was obtained. Through mechanical extraction, 8.7  
34 wt.% oil content occurs. The oil removed from the seed by mechanical presses desires  
35 additional handling of extraction and filtration to produce a purer raw feedstock. The oil  
36 production of AFSO was calculated by the following equation (1).

37

$$38 \text{ Conversion \%} = \frac{\text{Obtained seed oil weight}}{\text{Total seed weight}} \times 100 \quad (1)$$

39

40 Further following steps were done to get the AFOB, filtration, rotary evaporation for access  
41 methanol, heating, trans-esterification, settling, separation, and washing.

### 42 **S3. GC-MS Procedure**

43 The obtained AF biodiesel results were checked and tested by GCMS (QP2010SE, Shimadzu,  
44 Japan), furnished with a capillary column: PEG-20M (30 m × 0.32 mm × 1 μm film  
45 thickness). Helium gas flow rate 1.2 mL/min; split ratio 40:1; the injector temperature and  
46 injection volume were 220 °C and 1 uL; Furnace heat up mode was 100 °C for 1 min, then  
47 from 100 °C rises to 210 °C at the increase rate of 10 °C/min. Sensor heat mode was 210 °C,  
48 and then for 20 min, the temperature was continuing at 210 °C; ion source temperature of 200  
49 °C; for electron impact 70 eV ionization mode used; mass range of 35-500 m/z. The AF  
50 FAMEs were identified with the mass spectrometry fragmentation design provided by the  
51 GCMS system software, as matched with those stored in the mass spectrometry library  
52 NIST14, and their fatty acid identity was further verifying by matching with known standards  
53 values.

### 54 **S4. ICP-OES procedure for AFOB elemental analysis**

55 For the presence of metals in the AFSDO biodiesel, it was explored through Inductively  
56 Coupled Plasma Spectrometer (Spectro-blue, Germany) and Elemental Analyzer (Vario EL  
57 CUBE, Germany). For the ICP-OES test, we take 1 g of oil sample for incinerating. The  
58 ashing process is as follows: Increase the oven temperature to 200 °C in one hour, then  
59 increase the heat to 500 °C and kept for 2 h, and finally increase to 800 °C and kept for 5 h.  
60 The ash was dissolved in 10 mL of 2 % HNO<sub>3</sub>. The prepared sample was used for elements  
61 finding and concentration test of the KP biodiesel (AFBD).

### 62 **S5. Elemental analyzer (EA) procedure for AFOB elemental analysis**

63 Procedure for EA sample preparation: Element analyzer (Vario EL CUBE, Germany), the  
64 instrument was used to detect the H, N, C, and O concentration of AF biodiesel. We take  
65 0.5 mL of AFBD, 3 mL of concentrated HCl and 1 mL of Nitric acid in a tube and put them  
66 for 10-15 min rest, to dissolve the oil in the solution. Fresh reagents can be used for sample  
67 preparation. The aqua regia amount would be double than the sample. Then we take 1 mL of  
68 prepared solution in a new tube and add deionized water up to 5 mL. We repeated the same  
69 technique 2-3 times until the sample becomes clean and bright and use for C, H, N, and O  
70 concentration testing.

72 **Table S1. Source collection, oil extraction and transesterification of non-edible AF seed**  
 73 **oil as biodiesel**

| Source name              | Soxhlet extraction | Mechanical extraction | Biodiesel conversion % | Glycerine % | Soap % | Source collection                         |
|--------------------------|--------------------|-----------------------|------------------------|-------------|--------|-------------------------------------------|
| <i>Acacia Farnesiana</i> | 23                 | 8.3                   | 96                     | 3           | 1      | Collected from the wild field of Pakistan |

74

75

76 **Table S2. Catalysts effect on FAMEs conversion yield**

| Catalyst            | Catalyst Conc. (wt%) | FAMEs % | Glycerine % | Soap % |
|---------------------|----------------------|---------|-------------|--------|
| KOH                 | 2.0                  | 81      | 14          | 5      |
|                     | 2.5                  | 86      | 9           | 5      |
|                     | 3.0                  | 94      | 5           | 1      |
|                     | 3.5                  | 91      | 6.5         | 2.5    |
| NaOH                | 2.5                  | 83      | 13          | 4      |
|                     | 3.0                  | 93.5    | 4.5         | 2      |
|                     | 3.5                  | 93      | 5           | 2      |
| CaO                 | 2.5                  | 87      | 9           | 4      |
|                     | 3.0                  | 92      | 5           | 3      |
|                     | 3.5                  | 91.5    | 7           | 1.5    |
| CH <sub>3</sub> ONa | 2.5                  | 88      | 8           | 4      |
|                     | 3.0                  | 91.5    | 6.5         | 2      |
|                     | 3.5                  | 90      | 7           | 3      |
| CH <sub>3</sub> OK  | 2.5                  | 81      | 13          | 6      |
|                     | 3.0                  | 91      | 7           | 2      |
|                     | 3.5                  | 88      | 6           | 6      |
| ZrO <sub>2</sub>    | 2.5                  | 85      | 10          | 5      |
|                     | 3.0                  | 90      | 6           | 4      |
|                     | 3.5                  | 88      | 7           | 5      |

77

78 **Table S3.** AF FAMES detail process of optimization

| Amount of oil used (M/L) | Molar ratio of oil to alcohol | Temp (°C) | Stirring intensity (rpm) | Reaction time (min) | Amount of catalyst used |                         |               | Percentage yield of Different product |          |  |
|--------------------------|-------------------------------|-----------|--------------------------|---------------------|-------------------------|-------------------------|---------------|---------------------------------------|----------|--|
|                          |                               |           |                          |                     | KOH (wt%)               | CH <sub>3</sub> OH (mL) | Biodiesel (%) | Glycerol (%)                          | Soap (%) |  |
| 10                       | 4:1                           | 65        | 700                      | 6                   | 4.0                     | 2.5                     | 85            | 12                                    | 3        |  |
| 10                       | 5:1                           | 65        | 700                      | 6                   | 3.5                     | 2                       | 91            | 7                                     | 2        |  |
| 10                       | 6:1                           | 65        | 700                      | 6                   | 3.0                     | 1.6                     | 96            | 3                                     | 1        |  |
| 10                       | 7:1                           | 65        | 700                      | 6                   | 2.5                     | 1.4                     | 90            | 6                                     | 4        |  |
| 10                       | 6:1                           | 65        | 700                      | 6                   | 2.0                     | 1.6                     | 81            | 14                                    | 5        |  |
| 10                       | 6:1                           | 65        | 700                      | 6                   | 2.5                     | 1.6                     | 86            | 9                                     | 5        |  |
| 10                       | 6:1                           | 65        | 700                      | 6                   | 3.0                     | 1.6                     | 94            | 5                                     | 1        |  |
| 10                       | 6:1                           | 65        | 700                      | 6                   | 3.5                     | 1.6                     | 91            | 6.5                                   | 2        |  |
| 10                       | 6:1                           | 65        | 700                      | 6                   | 4.0                     | 1.6                     | 85            | 12                                    | 3        |  |
| 10                       | 6:1                           | 60        | 700                      | 6                   | 3.0                     | 1.6                     | 89            | 9                                     | 2        |  |
| 10                       | 6:1                           | 65        | 700                      | 6                   | 3.0                     | 1.6                     | 96            | 4                                     | 0        |  |
| 10                       | 6:1                           | 70        | 700                      | 6                   | 3.0                     | 1.6                     | 90            | 6                                     | 4        |  |
| 10                       | 6:1                           | 75        | 700                      | 6                   | 3.0                     | 1.6                     | 85            | 10                                    | 5        |  |
| 10                       | 6:1                           | 65        | 500                      | 6                   | 3.0                     | 1.6                     | 89            | 6                                     | 5        |  |
| 10                       | 6:1                           | 65        | 600                      | 6                   | 3.0                     | 1.6                     | 92            | 8                                     | 0        |  |
| 10                       | 6:1                           | 65        | 700                      | 6                   | 3.0                     | 1.6                     | 96            | 4                                     | 0        |  |
| 10                       | 6:1                           | 65        | 800                      | 6                   | 3.0                     | 1.6                     | 88            | 8                                     | 4        |  |
| 10                       | 6:1                           | 65        | 700                      | 4                   | 3.0                     | 1.6                     | 87            | 10                                    | 3        |  |
| 10                       | 6:1                           | 65        | 700                      | 6                   | 3.0                     | 1.6                     | 95            | 5                                     | 0        |  |
| 10                       | 6:1                           | 65        | 700                      | 8                   | 3.0                     | 1.6                     | 93            | 5                                     | 2        |  |
| 10                       | 6:1                           | 65        | 700                      | 1                   | 3.0                     | 1.6                     | 90            | 5                                     | 5        |  |

79

80

81 **Table S4.** FTIR data presenting various functional groups in AF FAMES

| Peak no. | Wavenumber (cm <sup>-1</sup> ) | Group attribution | Vibration type                          | Absorption intensity |
|----------|--------------------------------|-------------------|-----------------------------------------|----------------------|
| 1        | 3006                           | =C-H              | Stretching                              | Strong               |
| 2        | 2925                           | -CH <sub>2</sub>  | Asymmetric stretching vibration         | Strong               |
| 3        | 2854                           | -CH <sub>2</sub>  | Symmetric stretching vibration          | Strong               |
| 4        | 1743                           | -C=O              | Stretching                              | Strong               |
| 5        | 1641                           | -CH <sub>2</sub>  | Shear type vibration                    | Middling             |
| 6        | 1361                           | -CH <sub>3</sub>  | Bending vibration                       | Middling             |
| 7        | 1170                           | C-O-C             | Symmetric stretching vibration,         | Middling             |
| 8        | 1016                           | C-O-C             | Anti-stretching vibrations<br>Vibration | Weak                 |
| 9        | 723                            | -CH <sub>2</sub>  | Plane rocking vibration                 | Weak                 |

82

83 **Table S5.** <sup>1</sup>H NMR spectroscopic data showing the chemical composition of various methyl  
84 esters (Methoxy proton) in AF biodiesel (FAMES)

| Integration value | Chemical shift ppm | Multiplicity | Inferences                                                                                 |
|-------------------|--------------------|--------------|--------------------------------------------------------------------------------------------|
| 3                 | 0.88               | Multiplet    | CH <sub>3</sub> is attached to the aliphatic group.                                        |
| 16                | 1.27               | Multiplet    | A long aliphatic chain is present.                                                         |
| 2                 | 1.61               | Quartet      | CH <sub>2</sub> group is attached to terminal CH <sub>3</sub> .                            |
| 3                 | 2.03               | Multiplet    | CH <sub>2</sub> of long-chain aliphatic (Saturated) group.                                 |
| 2                 | 2.29               | Triplet      | CH <sub>2</sub> group is attached with CH of long aliphatic (unsaturated/ Olefinic group). |
| 1                 | 2.77               | Triplet      | CH group is attached with an electron-withdrawing carbonyl group.                          |
| 3                 | 3.66               | Singlet      | Methoxy (OCH <sub>3</sub> ) group attached with an electron-withdrawing carbonyl group.    |
| 3                 | 5.33               | Multiplet    | Olefinic hydrogen of a long-chain unsaturated aliphatic group                              |

85

86

87

88

89 **Table S6.**  $^{13}\text{C}$  NMR spectroscopic data showing the chemical shift values corresponding to  
90 various structural features in AF (Methoxy carbon) FAMES

| <b>Peak no:</b> | <b>Peak area/ region/ ppm</b> | <b>Identified compound</b> | <b>Chemical structure</b> |
|-----------------|-------------------------------|----------------------------|---------------------------|
| 1               | 14.07ppm                      | Terminal methyl carbon     | -CH <sub>3</sub>          |
| 2               | 22.55-34.09ppm                | Methylene carbon           | -CH <sub>2</sub>          |
| 3               | 51.37ppm                      | Methoxy carbon             | -OCH <sub>3</sub>         |
| 4               | 127.91-130.19ppm              | Olefinic carbon            | C=C                       |
| 5               | 174.24ppm                     | Carboxyl carbon of ester   | -COOCH <sub>3</sub>       |

92 **Table S7.** Shows AF-BD ICP-OES detail elements concentration ( $\mu\text{g/g}$ ) in comparison with  
 93 petrodiesel

| Name of elements | Elements conc. $\mu\text{g/L}$ , $\mu\text{g/mL}$ | Exp. Results Elements conc. $\mu\text{g/g}$ | Petro-diesel elements conc. | The density of the Source Ac. F $\text{g/cm}^3$ |
|------------------|---------------------------------------------------|---------------------------------------------|-----------------------------|-------------------------------------------------|
| <b>Mg</b>        | <b>1.05</b>                                       | <b>1.26</b>                                 | <b>35.6</b>                 | 0.83134                                         |
| Zn               | 55.06                                             | 66.2                                        | 9.5                         | 0.83134                                         |
| Al               | 42.12                                             | 50.6                                        | -                           | 0.83134                                         |
| <b>Na</b>        | <b>21.0</b>                                       | <b>25.2</b>                                 | <b>868.3</b>                | 0.83134                                         |
| Li               | 16.28                                             | 19.5                                        | 1.6                         | 0.83134                                         |
| Ni               | 9.586                                             | 11.5                                        | 12.4                        | 0.83134                                         |
| <b>Ca</b>        | <b>8.58</b>                                       | <b>10.3</b>                                 | <b>21.4</b>                 | 0.83134                                         |
| S                | 1.02                                              | <b>1.22</b>                                 | -                           | 0.83134                                         |
| Mn               | 4.563                                             | 5.4                                         | 1.5                         | 0.83134                                         |
| V                | 4.422                                             | 5.3                                         | -                           | 0.83134                                         |
| <b>K</b>         | <b>4.08</b>                                       | <b>4.9</b>                                  | <b>213.3</b>                | 0.83134                                         |
| Co               | 1.514                                             | 1.8                                         | 21.2                        | 0.83134                                         |
| <b>P</b>         | <b>0.660</b>                                      | <b>0.79</b>                                 | -                           | 0.83134                                         |

94

95 **Table 8.** AF FAMEs EA (elemental analysis) study for C, H, N, and O

| Ultimate analysis            | AF-BD | pistachio shell <sup>1</sup> | Peach Stones <sup>2</sup> | Apricot kernel shells <sup>3</sup> | Cherry Stones <sup>4</sup> | Mahua Seed <sup>5</sup> |
|------------------------------|-------|------------------------------|---------------------------|------------------------------------|----------------------------|-------------------------|
| C%                           | 76.37 | 42.41                        | 45.92                     | 47.33                              | 52.48                      | 61.24                   |
| H%                           | 13.34 | 5.64                         | 6.09                      | 6.37                               | 7.58                       | 8.40                    |
| N%                           | 2.18  | 0.070                        | 0.580                     | 0.370                              | 4.54                       | 4.12                    |
| O%                           | 8.11  | 51.87                        | 47.38                     | 45.93                              | 35.30                      | 25.50                   |
| Higher heating value (MJ/kg) | 23.39 | 22.21                        | 24.07                     | 24.29                              | 24.11                      | 25.30                   |

96

## 97 References

- 98 1. Acikalın K, Karaca F, Bolat E, Fuel, 2012, 95, 169–717.
- 99 2. Uysal T, Duman G, Onal Y, Yasa I, Yanik J, J. Anal. Appl. Pyrol., 2014, 108, 47–  
 100 55.
- 101 3. Demiral I, Kul SC, J. Anal. Appl. Pyrol., 2014, 107, 17–24.
- 102 4. Duman G, Okutucu C, Ucar S, Stah R, Yanik J, Bioresour. Technol. 2011, 102,  
 103 1869–1878.



104 5. Pradhan D, Singh RK, Bendu H, Mund R, Energy Convers. Manage., 2016, 108:  
105 529–538.
